# Supplementary material
Source: HighWire-hosted journal article supplement (https://bmjopen.bmj.com/content/10/5/e033449)
Supplement: inline-supplementary-material-2 [file inline-supplementary-material-2.pdf]

**Additional information on participants' health care experiences**

|                                                                             | Number of participants sharing experience with the respective health care provider |
|-----------------------------------------------------------------------------|------------------------------------------------------------------------------------|
| General practitioner                                                        | 25                                                                                 |
| Specialist physician                                                        | 24                                                                                 |
| Hospital                                                                    | 24                                                                                 |
| Ambulatory nursing                                                          | 2                                                                                  |
| Rehabilitation                                                              | 12                                                                                 |
| Nursing home                                                                | 4                                                                                  |
| Psychotherapy                                                               | 6                                                                                  |
| Other therapists (speech therapy, occupational therapy, physiotherapy etc.) | 11                                                                                 |

**Acute health issues participants reported**

- Severe cuts
- Falls & accidents
- Common cold
- (inflamed) Cysts
- Vaccinations
- Tuberculosis
- Pregnancy
- Endometriosis
- Hysterectomy and / or Oophorectomy
- Tinnitus
- Vertigo
- Food intolerance
- Respiratory obstruction
- Tonsillitis
- Appendectomy
- Cholecystectomy
- Back pain
- Eczema & rash
- Pain
- Allergies / acute allergic reactions
- Burns
- Disc prolapse
- Haematochezia
- Ruptured appendix
- Fractures (arm, jaw)
- Pneumonia
- ruptured appendix
- shoulder & gall bladder surgery
